# Supplementary material for: Moving towards Integrated and Personalized Care in Parkinson’s Disease: A Framework Proposal for Training Parkinson Nurses
Source: MDPI journal article supplement (doi:10.3390/jpm11070623), 2021-06-30
Supplement: s1 [file s1]

SUPPLEMENTARY MATERIAL

# Moving towards integrated and personalized care in Parkinson's disease: proposing a framework for training Parkinson Nurses

**Table S1.** Search Strategy and In- and Exclusion Criteria

| Question                         | What are the care priorities for PD?                                                                                                                                                                                                                                                                                                                                                                                                                                                                                                                                                                                                                                                                                                                                                                                                                                                                                                                                                          |
|----------------------------------|-----------------------------------------------------------------------------------------------------------------------------------------------------------------------------------------------------------------------------------------------------------------------------------------------------------------------------------------------------------------------------------------------------------------------------------------------------------------------------------------------------------------------------------------------------------------------------------------------------------------------------------------------------------------------------------------------------------------------------------------------------------------------------------------------------------------------------------------------------------------------------------------------------------------------------------------------------------------------------------------------|
| Inclusion                        | <ul style="list-style-type: none"> <li>Study Type: <ul style="list-style-type: none"> <li>Clinical Study</li> <li>Quantitative or Qualitative Study</li> <li>Literature Review</li> <li>Conceptual or theoretical paper</li> <li>Clinical Guidelines</li> </ul> </li> <li>Study Population: <ul style="list-style-type: none"> <li>Patients with Parkinson's Disease diagnosed as per United Kingdom Parkinson's Disease Society Brain Bank criteria and of either sex</li> </ul> </li> <li>Setting: any setting</li> <li>Thematically: <ul style="list-style-type: none"> <li>Describing an existing care model for Parkinson's Disease</li> <li>Scientific guidelines regarding Parkinson's Disease care</li> <li>Interventions implementing a care model for Parkinson's Disease</li> <li>Theorizing care concepts or aspects of care</li> </ul> </li> <li>Publication Date: no restriction</li> <li>Geographical location: no restriction</li> <li>Language: English or German</li> </ul> |
| Exclusion                        | <ul style="list-style-type: none"> <li>Study type: <ul style="list-style-type: none"> <li>Study Protocol</li> <li>Perspective/ Editorial</li> </ul> </li> <li>Thematically: <ul style="list-style-type: none"> <li>Models focusing on palliative care</li> <li>Systematic Literature Review not describing or theorizing a care model</li> </ul> </li> </ul>                                                                                                                                                                                                                                                                                                                                                                                                                                                                                                                                                                                                                                  |
| Database:                        | MedLine; Web of Science                                                                                                                                                                                                                                                                                                                                                                                                                                                                                                                                                                                                                                                                                                                                                                                                                                                                                                                                                                       |
| Search terms:                    | parkinson's disease; concept; theory; model; care                                                                                                                                                                                                                                                                                                                                                                                                                                                                                                                                                                                                                                                                                                                                                                                                                                                                                                                                             |
| Search Strategy (MedLine)        | ("parkinson disease"[MeSH Terms] OR ("parkinson"[All Fields] AND "disease"[All Fields]) OR "parkinson disease"[All Fields] OR ("parkinsons"[All Fields] AND "disease"[All Fields]) OR "parkinsons disease"[All Fields]) AND (("concept"[All Fields] OR "concept s"[All Fields] OR "concepts"[All Fields] OR ("theorie"[All Fields] OR "theories"[All Fields] OR "theory"[All Fields] OR "theory s"[All Fields]) OR ("model"[All Fields] OR "model s"[All Fields] OR "modeled"[All Fields] OR "modeler"[All Fields] OR "modeler s"[All Fields] OR "modelers"[All Fields] OR "modeling"[All Fields] OR "modelings"[All Fields] OR "modelization"[All Fields] OR "modelizations"[All Fields] OR "modelize"[All Fields] OR "modeled"[All Fields] OR "modelled"[All Fields] OR "modeller"[All Fields] OR "modellers"[All Fields] OR "modelling"[All Fields] OR "modellings"[All Fields] OR "models"[All Fields])) AND "care"[All Fields])                                                          |
| Search Strategy (Web of Science) | ALL=(parkinson disease OR (parkinson* AND disease) OR parkinson*) AND ALL=(concept* OR theorie* OR theory OR model*) AND ALL=(care*)                                                                                                                                                                                                                                                                                                                                                                                                                                                                                                                                                                                                                                                                                                                                                                                                                                                          |

**Table S2.** Overview of Theoretical Concepts

| Concept                                                         | Content                                                                                                                                                                                                                                                                                                                                                                                                                                                                                                                                 |
|-----------------------------------------------------------------|-----------------------------------------------------------------------------------------------------------------------------------------------------------------------------------------------------------------------------------------------------------------------------------------------------------------------------------------------------------------------------------------------------------------------------------------------------------------------------------------------------------------------------------------|
| The Picker Institute Concept [64]                               | <p>Patient-centeredness consists of:<sup>1</sup></p> <ul style="list-style-type: none"> <li>• Accessibility</li> <li>• Information &amp; communication</li> <li>• Partner &amp; family involvement</li> <li>• Respect &amp; autonomy</li> <li>• Organization of healthcare</li> <li>• Continuity of care</li> <li>• Physical comfort</li> <li>• Emotional support</li> </ul>                                                                                                                                                            |
| A novel paradigm of continuous care in Parkinson's Disease [73] | <p>Care for PD should be enabled by three foundation pillars:</p> <ul style="list-style-type: none"> <li>(i) Integrated care</li> <li>(ii) Self-management support</li> <li>(iii) Technology-enabled care</li> </ul>                                                                                                                                                                                                                                                                                                                    |
| Active Aging Model for Parkinson's Disease [70]                 | <p>Components of active aging, that are influenced by Parkinson's Disease:</p> <ol style="list-style-type: none"> <li>1. Physical activity</li> <li>2. Mental well-being</li> <li>3. Social communication</li> </ol> <p>Potential consequences for:</p> <ul style="list-style-type: none"> <li>-&gt; Ability to learn over a lifetime</li> <li>-&gt; Employment status</li> <li>-&gt; Quality of life security</li> </ul> <p>Modifying caring approaches: palliative care; self-care; patient-centered care &amp; personalized care</p> |
| A multi-element definition of continuity of care [72]           | <p>To experience continuity, care delivery services need:</p> <ul style="list-style-type: none"> <li>• Continuity of information; continuity &amp; coherence of medical record</li> <li>• Cross-boundary and team continuity</li> <li>• Flexible continuity</li> <li>• Longitudinal continuity</li> <li>• Relational or interpersonal continuity</li> </ul>                                                                                                                                                                             |
| Five A's of self-management support [71]                        | <p>Five A's describe how the health-care professional can deliver SMS to the patient:</p> <ul style="list-style-type: none"> <li>• Assessing beliefs, behaviors and knowledge</li> <li>• Agreeing collaboratively on goals based on the patient's interest and confidence</li> <li>• Advising the patient on health risks and benefits of change</li> <li>• Arranging follow-ups</li> <li>• Assisting the patient to identify personal barriers and develop problem-solving techniques</li> </ul>                                       |
| An Implementation Model for Integrated Care [74]                | <p>Variables for care integration:</p> <ul style="list-style-type: none"> <li>• Type (i.e., organizational, professional, cultural, technological)</li> <li>• Level (i.e., micro-, meso- and macro-)</li> <li>• Process (management and organization of integrated care)</li> <li>• Breadth (whole population vs. specific client group) degree/ intensity (informal linkages vs. fully integrated teams)</li> </ul> <p>Key forms of integration: Horizontal, vertical, sectoral, people-centered, whole-system</p>                     |
| The Knowledge-Translation Framework [80]                        | <p>Eight steps for translating knowledge:</p> <ol style="list-style-type: none"> <li>1. Identify a problem that needs addressing</li> </ol>                                                                                                                                                                                                                                                                                                                                                                                             |

|                                                         |                                                                                                                                                                                                                                                                                                                                                                                                                                                                                                                                                                                                                                                                                                                                                                           |
|---------------------------------------------------------|---------------------------------------------------------------------------------------------------------------------------------------------------------------------------------------------------------------------------------------------------------------------------------------------------------------------------------------------------------------------------------------------------------------------------------------------------------------------------------------------------------------------------------------------------------------------------------------------------------------------------------------------------------------------------------------------------------------------------------------------------------------------------|
|                                                         | <ol style="list-style-type: none"> <li>2. Identify, review, and select the knowledge or research relevant to the problem</li> <li>3. Adapt the identified knowledge or research to the local context</li> <li>4. Assess barriers to using the knowledge</li> <li>5. Select, tailor, and implement interventions to promote the use of knowledge</li> <li>6. Monitor knowledge use</li> <li>7. Evaluate the outcomes of using the knowledge</li> <li>8. Sustain ongoing knowledge use</li> </ol>                                                                                                                                                                                                                                                                           |
| The Web of Needs and Demands Model [65]                 | <p>Living with PD means balancing within a web of needs and demands regarding:</p> <ol style="list-style-type: none"> <li>1. Competence</li> <li>2. Relatedness</li> <li>3. Autonomy</li> </ol> <p>-&gt; A needs-based approach represents an important starting point to better understanding the consequences of living with PD</p>                                                                                                                                                                                                                                                                                                                                                                                                                                     |
| Five C's for video-based therapy [28, 98]               | Care; convenience; comfort; confidentiality & contagion                                                                                                                                                                                                                                                                                                                                                                                                                                                                                                                                                                                                                                                                                                                   |
| The Development Model of Integrated Care [66]           | <p>Nine-cluster model for quality management in integrated care:</p> <ul style="list-style-type: none"> <li>• Patient-centeredness</li> <li>• Delivery system</li> <li>• Performance management</li> <li>• Quality of care</li> <li>• Result-focused learning</li> <li>• Interprofessional teamwork</li> <li>• Roles and tasks</li> <li>• Commitment</li> <li>• Transparent entrepreneurship</li> </ul> <p>Organizational development happens across 4 phases where different priorities need to be addressed</p>                                                                                                                                                                                                                                                         |
| World Health Organization responsiveness model [67]     | <p>Patient-centeredness consists of:<sup>1</sup></p> <ul style="list-style-type: none"> <li>• Confidentiality of information</li> <li>• Communication</li> <li>• Access to family and community support</li> <li>• Autonomy</li> <li>• Freedom to choose your own healthcare provider</li> <li>• Dignity</li> <li>• Prompt attention</li> <li>• Quality of basic amenities</li> </ul>                                                                                                                                                                                                                                                                                                                                                                                     |
| Orem's Self-Deficit Theory and the Nursing Process [68] | <p>Nursing is needed when the client's therapeutic self-care demand exceeds the available self-care agency</p> <p>The Nursing Process presents involves a method to determine self-care deficits and defining the roles of persons or nurses to meet the self-care demands:</p> <ol style="list-style-type: none"> <li>1. Assessing (patients' health status; physicians and patients' perspective on the health status; goals within the context of life history, lifestyle, and health status; the person's requirements for self-care; the person's capacity to perform self-care)</li> <li>2. Designing a care plan by organizing the patient's self-care demands and selecting a combination of helping methods</li> <li>3. Implementation and evaluation</li> </ol> |

|                                                                                         |                                                                                                                                                                                                                                                                                                                                                                                                                                                                                                |
|-----------------------------------------------------------------------------------------|------------------------------------------------------------------------------------------------------------------------------------------------------------------------------------------------------------------------------------------------------------------------------------------------------------------------------------------------------------------------------------------------------------------------------------------------------------------------------------------------|
| The Quality of Care Framework for Home-Based Medical Care [79]                          | <p>Home-based care comprises categories of quality:</p> <ul style="list-style-type: none"> <li>• Provider and practice activities</li> <li>• Provider characteristics</li> <li>• Outcomes for patients, caregiver and provider</li> </ul> <p>➔ Can be assessed in 10 domains and 49 standards</p>                                                                                                                                                                                              |
| Proactive and Integrated Management and Empowerment in Parkinson's Disease (PRIME) [75] | <p>Proactive and Integrated Management and Empowerment in Parkinson's Disease has five main components:</p> <ol style="list-style-type: none"> <li>1. Personalized care management</li> <li>2. Education and empowerment of patients and carers</li> <li>3. Empowerment of healthcare professionals</li> <li>4. A population health approach</li> <li>5. Support of the previous four components by patient- and professional-friendly technology</li> </ol>                                   |
| The Rainbow Model [76]                                                                  | <p>Care Services can be integrated across four domains:</p> <ol style="list-style-type: none"> <li>1. Clinical</li> <li>2. Professional</li> <li>3. Organizational</li> <li>4. Systems</li> </ol> <p>And on different scales (individual &lt;-&gt; population) whereby functional and normative enablers play a role.</p> <p>Ultimately, integration follows three aims: improving population health and experience of care while optimizing cost and utilization.</p>                         |
| Six core elements of patient-centered care [27]                                         | <ol style="list-style-type: none"> <li>1. Emotional support, empathy and respect</li> <li>2. Knowledge of PD treatment among caregivers</li> <li>3. Provision of tailored information</li> <li>4. Involvement in decisions and respect for patient preferences</li> <li>5. Continuity and collaboration of caregivers</li> <li>6. Accessibility of healthcare</li> </ol>                                                                                                                       |
| Five Core Elements of Personalized Care Management for Parkinson's Disease [78]         | <ol style="list-style-type: none"> <li>1. Information provision</li> <li>2. Proactive monitoring of early detection signs and symptoms</li> <li>3. Process monitoring</li> <li>4. Care coordination</li> <li>5. Patient navigation</li> </ol>                                                                                                                                                                                                                                                  |
| The Chronic Care Model [77]                                                             | <p>There are six elements, which can be addressed to improve chronic care:</p> <ul style="list-style-type: none"> <li>• Organization of health care</li> <li>• Design of the delivery system</li> <li>• Decision support</li> <li>• Clinical information system</li> <li>• Self-management support</li> <li>• Community resources</li> </ul> <p>In order to deliver good self-management support, healthcare professionals should have knowledge about structures and available resources.</p> |

<sup>1</sup> adapted from [27]
